# Supplementary material for: Validation and reliability of the Bahasa Malaysia language version of the Acceptance of Illness Scale among Malaysian patients with cancer
Source: PubMed Central journal article supplement (PMC8480610; doi:10.1371/journal.pone.0256216), 2021-09-29
Supplement: pone.0256216.s002.pdf [file pone.0256216.s002.pdf]

## S2 APPENDIX

### SKALA PENERIMAAN PENYAKIT (BAHASA MALAYSIA VERSION)

**Arahan:** Sila budarkan nombor yang sesuai di sebelah kanan setiap pernyataan, yang menunjukkan tahap penerimaan penyakit. Contohnya, jika pernyataan diberi berkaitan dengan anda, maka anda perlu bundarkan 1 dalam lajur pertama. Peserta menilai pernyataan dalam skala dari 1 (penerimaan sangat lemah terhadap penyakit), 2 (penerimaan buruk terhadap penyakit), 3 (penerimaan rata-rata terhadap penyakit), 4 (penerimaan terhadap penyakit), dan 5 (penerimaan sepenuhnya terhadap penyakit).

|                                                                                                          | Sangat setuju | Setuju | Tidak tahu | Tidak setuju | Sangat tidak setuju |
|----------------------------------------------------------------------------------------------------------|---------------|--------|------------|--------------|---------------------|
| 1.Saya menghadapi masalah dengan penyesuaian terhadap batasan yang dikenakan oleh penyakit               | 1             | 2      | 3          | 4            | 5                   |
| 2.Saya tidak dapat melakukan apa yang saya sukai dengan baik disebabkan oleh keadaan kesihatan saya      | 1             | 2      | 3          | 4            | 5                   |
| 3.Penyakit ini kadang-kadang membuatkan saya berasa tidak diperlukan                                     | 1             | 2      | 3          | 4            | 5                   |
| 4.Saya bergantung pada orang lain lebih daripada apa yang saya mahukan kerana masalah kesihatan          | 1             | 2      | 3          | 4            | 5                   |
| 5.Saya menjadi beban kepada keluarga dan rakan-rakan saya oleh kerana penyakit ini                       | 1             | 2      | 3          | 4            | 5                   |
| 6.Saya tidak berasa seperti manusia yang dihargai sepenuhnya oleh kerana status kesihatan saya           | 1             | 2      | 3          | 4            | 5                   |
| 7.Saya tidak dapat mencapai tahap yang saya inginkan                                                     | 1             | 2      | 3          | 4            | 5                   |
| 8.Saya merasakan bahawa orang yang tinggal bersama saya sering berasa malu disebabkan oleh penyakit saya | 1             | 2      | 3          | 4            | 5                   |
